# Supplementary material
Source: PubMed Central journal article supplement (PMC6662586)
Supplement: NIHMS1039629-supplement-Supplementary_information.pdf [file NIHMS1039629-supplement-Supplementary_information.pdf]

***Supporting information***

**Aptamer-Functionalized Exosomes: Elucidating the Cellular Uptake Mechanism and the Potential for Cancer-Targeted Chemotherapy**

Jianmei Zou<sup>1</sup>, Muling Shi<sup>1,3</sup>, Xiaojing Liu<sup>1</sup>, Cheng Jin<sup>1</sup>, Xiaojing Xing<sup>1</sup>, Liping Qiu<sup>\*,1</sup>, Weihong Tan<sup>1,2</sup>

*<sup>1</sup>Molecular Science and Biomedicine Laboratory, State Key Laboratory for Chemo/Bio-Sensing and Chemometrics, College of Chemistry and Chemical Engineering, College of Life Sciences, and Aptamer Engineering Center of Hunan Province, Hunan University, Changsha, Hunan 410082, China*

*<sup>2</sup>Center for Research at Bio/Nano Interface, Department of Chemistry and Department of Physiology and Functional Genomics, University Health Cancer Center, UF Genetics Institute and McKnight Brain Institute, University of Florida, Gainesville, Florida 32611-7200, United States*

*<sup>3</sup>Hunan Provincial Key Laboratory of Forestry Biotechnology, College of Life Science and Technology, Central South University of Forestry & Technology, Changsha 410004, China*

\* To whom correspondence should be addressed.

E-mail: qiuliping@hnu.edu.cn

Tel: +86-731-88821894

## Table of Content

|                                                                                                          |     |
|----------------------------------------------------------------------------------------------------------|-----|
| Table S1. DNA sequences designed in this work.....                                                       | S-3 |
| Figure S1. Western blot analysis of specific Exos marker proteins (CD63).....                            | S-3 |
| Figure S2. Fluorescence spectra of the precipitant solution in different samples.....                    | S-4 |
| Figure S3. CEM cells or Ramos cells were treated with TAMRA-labeled diacylipid-sgc8 conjugates.....      | S-4 |
| Figure S4. Relative fluorescence intensity of Dil remained in the Exos.....                              | S-5 |
| Figure S5. CLSM images of CEM cells incubated with Dil-labeled Exos or sgc8-Exos for different time..... | S-5 |
| Figure S6. CLSM images of CEM cells incubated with Dil-labeled sgc8-Exos at different conditions.....    | S-6 |
| Figure S7. CLSM images of CEM cells incubated with cy5-labeled sgc8 at different conditions.....         | S-6 |
| Figure S8. CLSM images of CEM cells incubated with Dil-labeled Exos at different conditions.....         | S-7 |
| Figure S9. Fluorescence spectra of Dox after incubation with different concentration of Exos or BSA..... | S-7 |
| Figure S9. Release profiles of free Dox and Dox from Exos-D in PBS.....                                  | S-7 |
| Figure S10. CLSM images of CEM cells or Ramos cells treated with sgc8-Exos-D or lib-Exos-D.....          | S-8 |



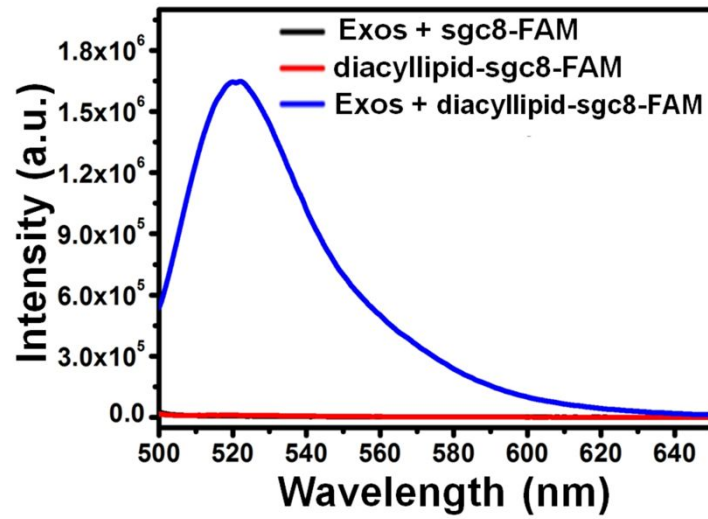

**Figure S2.** Fluorescence spectra of the precipitant solution in different samples.

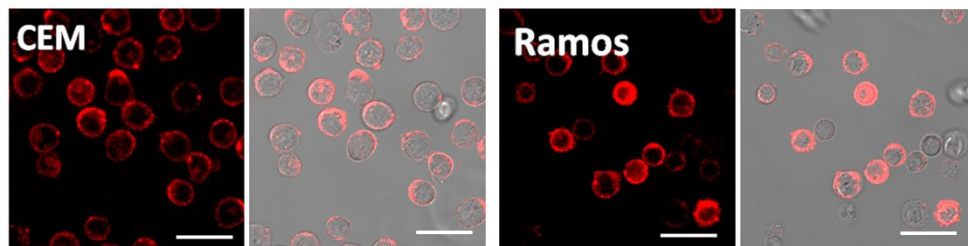

**Figure S3.** CLSM images of CEM cells or Ramos cells treated with TAMRA-labeled diacyllipid-sgc8 conjugates (500 nM) at 37 °C for 0.5 h. The scale bar represents 20  $\mu\text{m}$ .

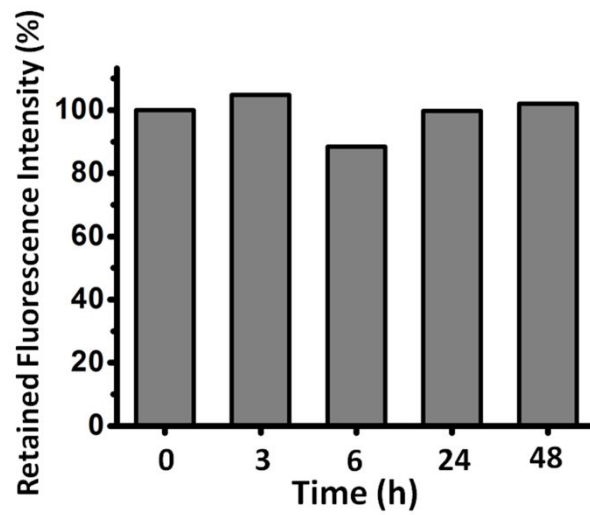

**Figure S4.** Relative fluorescence intensity of Dil remained in the Exos after incubation in PBS (pH 7.4) for different time spans.

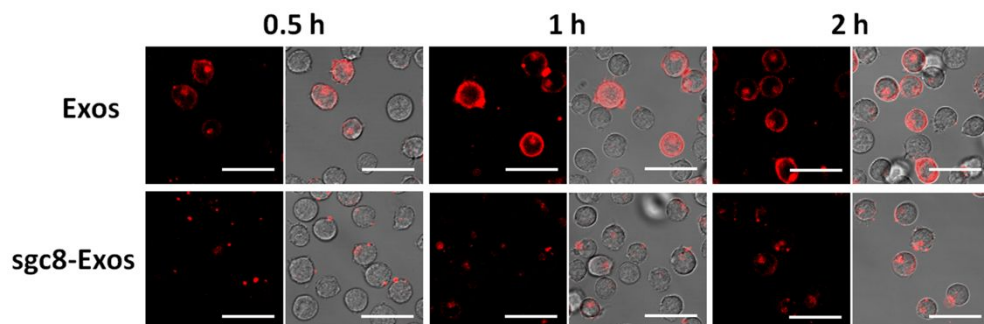

**Figure S5.** CLSM images of CEM cells incubated with Dil-labeled Exos or Dil-labeled sgc8-Exos for different lengths of time. The scale bar represents 30  $\mu\text{m}$ .

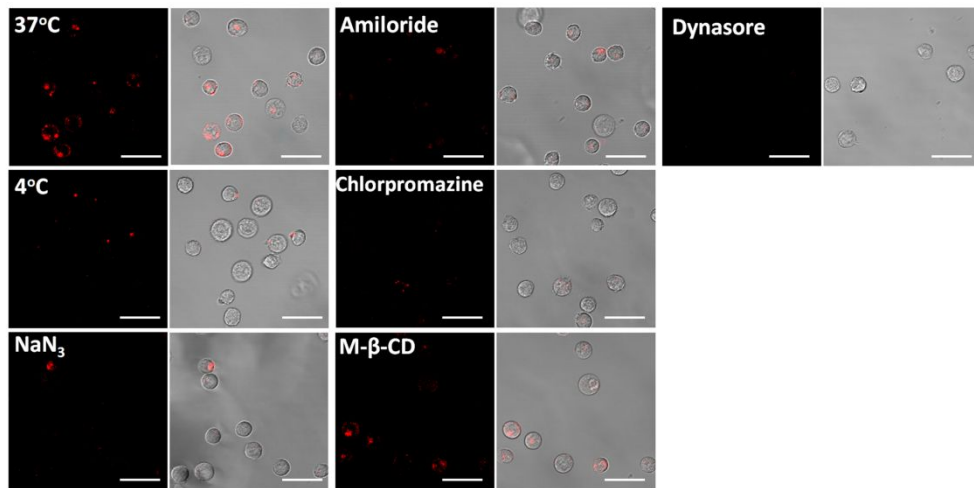

**Figure S6.** CLSM images of CEM cells incubated with Dil-labeled sgc8-Exos at different conditions. The scale bar represents 30  $\mu\text{m}$ .

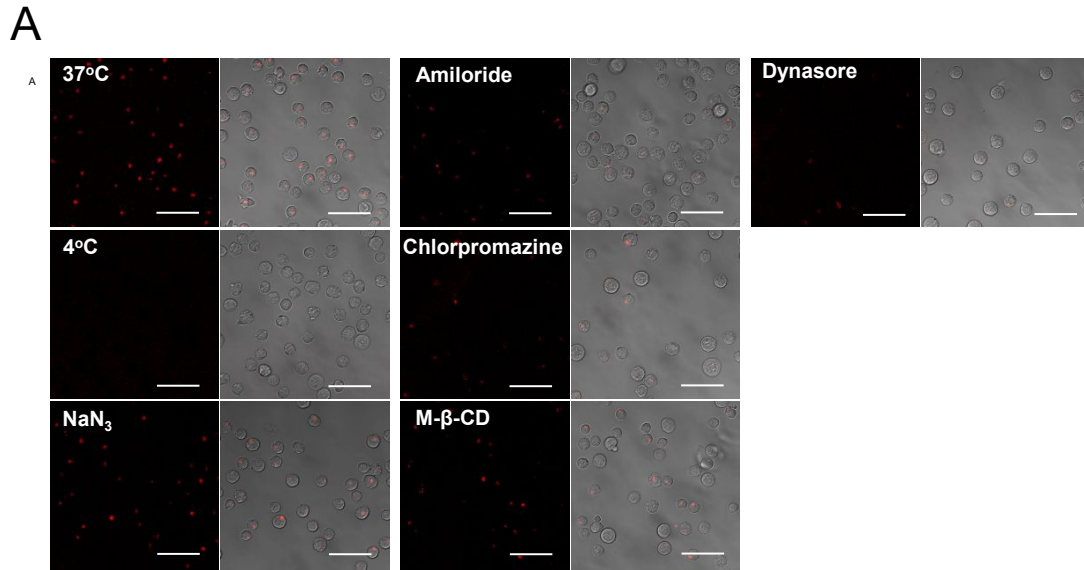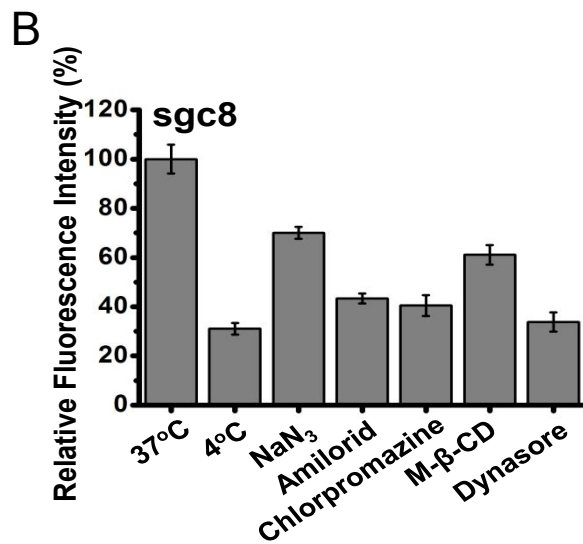

**Figure S7.** (A) CLSM images of CEM cells incubated with Cy5-labeled *sgc8* at different conditions. The scale bar represents 30  $\mu\text{m}$ . (B) Histogram analysis of the corresponding fluorescence signal.

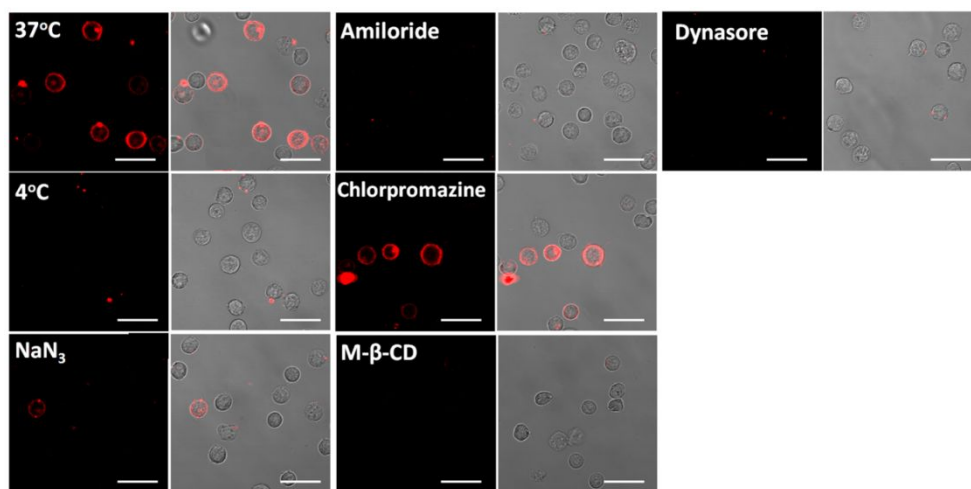

**Figure S8.** CLSM images of CEM cells incubated with Dil-labeled Exos at different conditions. The scale bar represents 30  $\mu\text{m}$ .

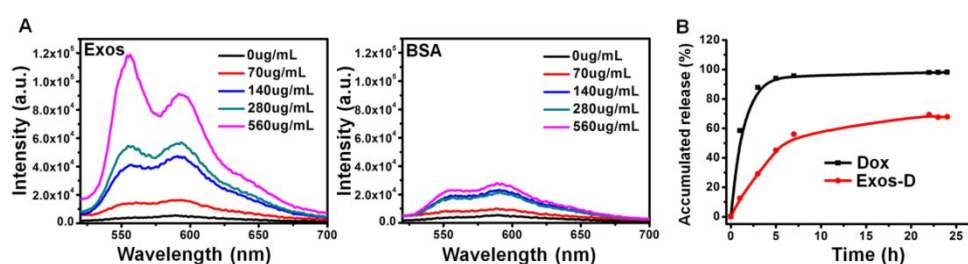

**Figure S9.** (A) Fluorescence spectra of Dox after incubation with different concentration of Exos or BSA. (B) Release profiles of free Dox and Dox from Exos-D in PBS (pH 7.4).



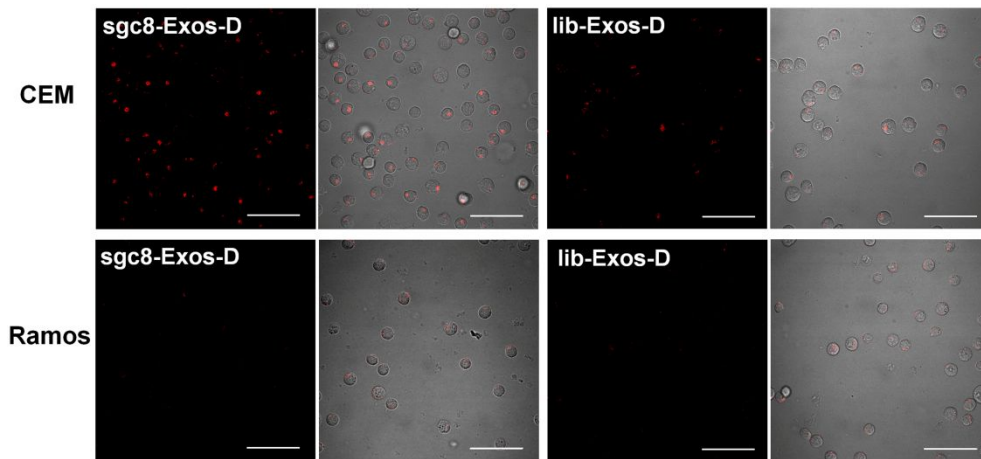

**Figure S10.** CLSM images of CEM cells or Ramos cells treated with sgc8-Exos-D (A) or lib-Exos-D (B) at 37 °C for 1 h. The scale bar represents 50  $\mu$ m.

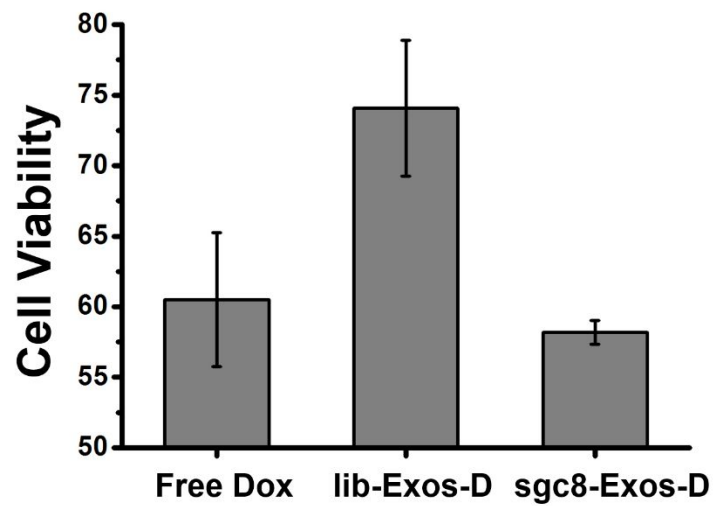

**Figure S11.** Cytotoxicity assay of CEM cells incubated with free Dox, lib-Exos-D or sgc8-Exos-D at 37 °C for 48 h. The corresponding concentration of Dox was fixed at 1  $\mu$ M.
